# Supplementary material for: Novel self-assembling system based on resorcinarene and cationic surfactant
Source: Royal Society of Chemistry journal article supplement (doi:10.1039/c1cp20906j), 2011-01-01
Supplement: c1cp20906j.pdf [file c1cp20906j.pdf]

## Novel self-assembling system based on resorcinarene and cationic surfactant

Ruslan R. Kashapov,<sup>a,b</sup> Tatiana N. Pashirova,<sup>a</sup> Sergey V. Kharlamov,<sup>a</sup> Albina Yu. Ziganshina,<sup>a</sup> Elena P. Ziltsova,<sup>a</sup> Svetlana S. Lukashenko,<sup>a</sup> Lucia Ya. Zakharova<sup>a,b</sup>, Wolf D. Habicher<sup>c</sup>, Shamil K. Latypov<sup>a</sup> and Alexander I. Konovalov<sup>a</sup>

<sup>a</sup> A.E. Arbusov Institute of Organic and Physical Chemistry of the Russian Academy of Sciences, 8 Arbuzov Str., Kazan 420088, Russia.

<sup>b</sup> Kazan State Technological University, 68 Karl Marx Str., Kazan 420015, Russia

<sup>c</sup> Technical University, Bergstr. 66c D-01062 Dresden, Germany

E-mail: [lucia@iopc.ru](mailto:lucia@iopc.ru)

Supporting Information Available: description of the NMR self-diffusion procedure, calculations of binding constants, and plots on self-diffusion coefficients and the  $\Delta E$  values.

### *PGSE (Pulsed Gradient Spin-Echo) experiments*

All diffusion-ordered (DOSY) experiments were performed by BPP-STE-LED (bipolar pulse pair–stimulated echo–longitudinal eddy current delay) pulse sequence.<sup>45</sup> Data were acquired with a 50.0 ms diffusion delay, and gradient pulse duration from 2.4 to 6.2 ms (depending on the system under investigation), 1 ms spoil gradient pulse and a 5.0 ms eddy current delay. The sine-shaped pulse gradients were incremented from 2 to 95% of the maximum gradient strength in a linear ramp (up to 0.32 T/m in 16 or 32 steps).

The diffusion experiments were performed at least three times. All separated peaks were analyzed and the average values were presented. The temperature was set and controlled at 22° C with an air flow of 535 l/h in order to minimize convection effects. After Fourier transformation and baseline correction, the diffusion dimension was processed with the Bruker XWINNMR software package (version 3.5). The error of the determination of self-diffusion coefficients did not exceed 5%.

### *Details of the coefficient $K_S$ calculation*

Two-site “bound-free” model:

$$D_{obs} = X_{free} D_{free} + X_{bound} D_{bound} \quad (S1)$$

where  $X_{free}$ ,  $D_{free}$  is the the mole fraction of free molecules (monomers) and corresponding self-diffusion coefficient, respectively;  $X_{bound}$ ,  $D_{bound}$  is the the mole fraction of bound molecules (e.g. associated, aggregated, etc.) and the corresponding self-diffusion coefficient, respectively.

By definition:

$$X_{free} + X_{bound} = 1. \quad (S2)$$

After combining (S1) and (S2) one can obtain:

$$X_{bound} = \frac{D_{free} - D_{obs}}{D_{free} - D_{bound}} \quad (S3)$$

When applied to the molecules of **1** in the binary system (**1**+DABCO-16, see text for details) this model results in the dependence of  $X_{bound}$  on concentration of DABCO-16 (Table S1). Thus, the

coefficient  $K_S = \frac{C_{1(bound)}}{C_{DABCO}}$ , where  $C_{1(bound)} = X_{bound} \times C_{1(total)}$  is the concentration of the bound

molecules of **1**, can be calculated (Table S1). Here  $C_{1(total)}$  is the total concentration of **1** (constant and equal 1 mM).

The following constant values were used:

$D_{free} = 2.31 \cdot 10^{-10} \text{ m}^2/\text{s}$  – self-diffusion coefficient of **1** in individual solution at the same concentration as in binary systems (1 mM).

$D_{bound} = 0.1 \cdot 10^{-10} \text{ m}^2/\text{s}$  – self-diffusion coefficient of mixed aggregates ‘**1**+DABCO-16’ (see text for details). This value was estimated by extrapolation of concentration dependence of the self-diffusion coefficient of **1** to the low concentration region.

Table S1. Dependencies of self-diffusion coefficient, mole fraction, concentration of bound **1** and coefficient  $K_S$  on the concentration of DABCO-16 in binary systems

| $C_{DABCO}, 10^{-3} \text{ M}$ | $D_1, 10^{-10} \text{ m}^2/\text{s}$ | $X_{1(bound)}$ | $C_{1(bound)}, 10^{-3} \text{ M}$ | $K_S$ |
|--------------------------------|--------------------------------------|----------------|-----------------------------------|-------|
| 0.05                           | 2.21                                 | 0.05           | 0.05                              | 0.90  |
| 0.14                           | 2.05                                 | 0.12           | 0.12                              | 0.84  |
| 0.21                           | 1.93                                 | 0.17           | 0.17                              | 0.82  |
| 0.43                           | 1.76                                 | 0.25           | 0.25                              | 0.58  |
| 0.786                          | 1.69                                 | 0.28           | 0.28                              | 0.36  |
| 1.07                           | 1.6                                  | 0.32           | 0.32                              | 0.30  |
| 4.29                           | 0.86                                 | 0.66           | 0.66                              | 0.15  |
| 5.7                            | 0.74                                 | 0.71           | 0.71                              | 0.12  |
| 11.4                           | 0.62                                 | 0.76           | 0.76                              | 0.07  |

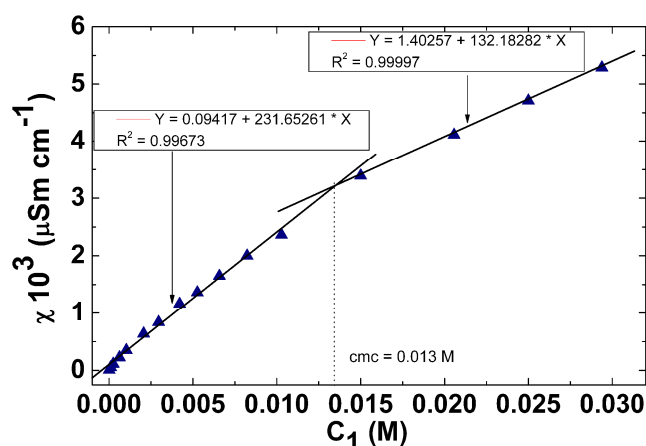

Fig. 1S. Linearization of the conductivity versus calixarene concentration data below and above the cmc value.

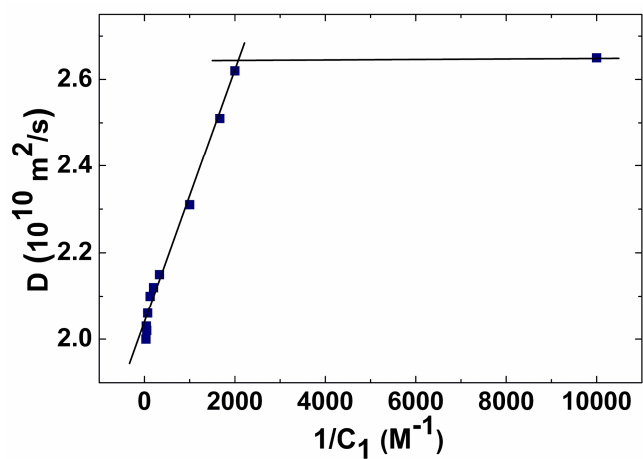

Fig. 2S. Dependence of self-diffusion coefficients of 1 on its inverse concentration; pH 9.0.

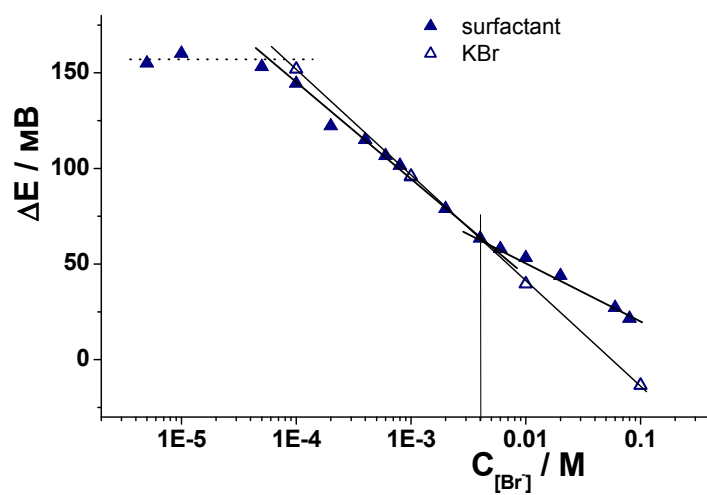

Fig. 3S. The  $\Delta E$  versus  $[Br]$  dependence for the mixed 1-DABCO-16 system and KBr solution; pH 9.0; 25°C.
